# Supplementary material for: Diversity and Oil Degradation Potential of Culturable Microbes Isolated from Chronically Contaminated Soils in Trinidad
Source: MDPI journal article supplement (doi:10.3390/microorganisms9061167), 2021-05-28
Supplement: s1 [file s1]

# Supplementary Material

## 1. Supplementary Data

### 1.1. Supplementary Figures

A

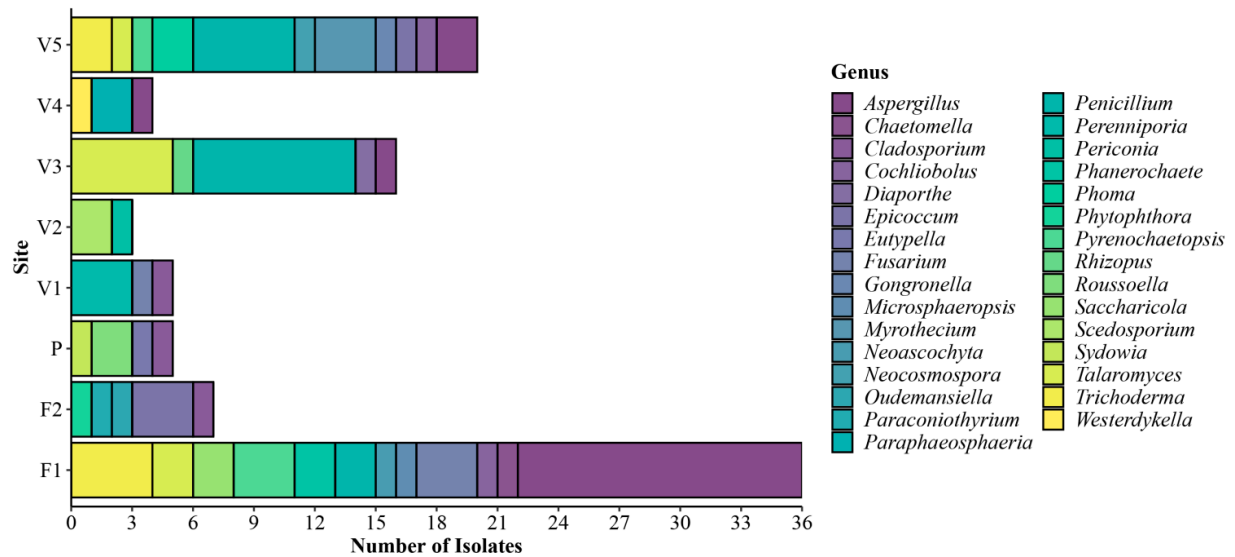

B

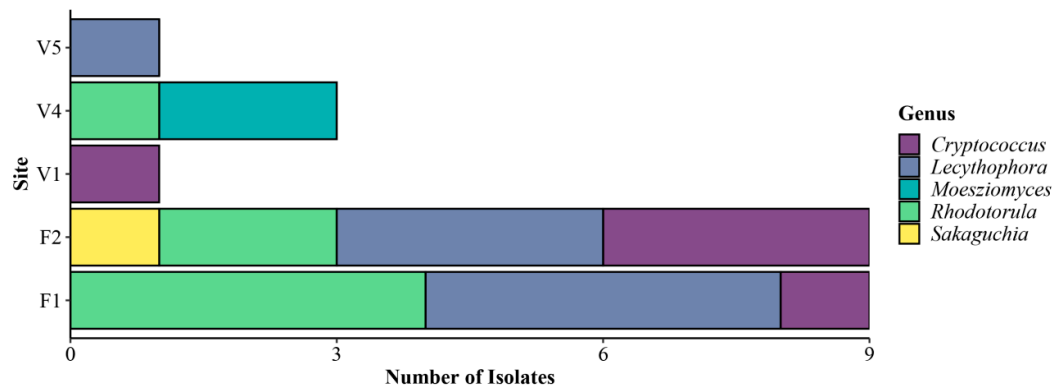

**Figure S1:** Absolute abundances of microbes detected. Abundance of: (A) filamentous fungi and (B) yeast per genus among the 8 sites in southwestern Trinidad.

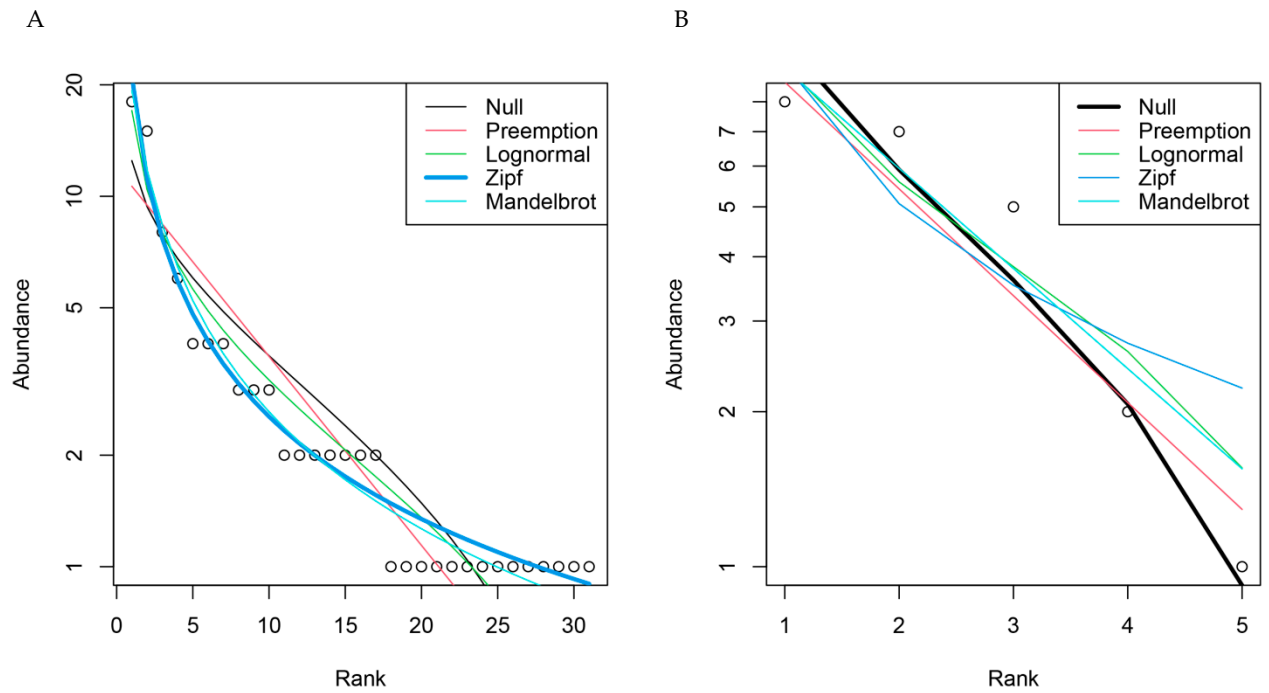

**Figure S2:** Rank-abundance dominance (RAD) plots for genera distribution of: (A) filamentous fungi and (B) yeast. The best model is represented by the bolded line. Null represents the MacArthur model; Preemption represents the geometric series of Motomura Model; Lognormal represents the Lognormal distribution of Preston; Zipf represents the Zipf Model; Mandelbrot represents the Zipf-Mandelbrot Model.



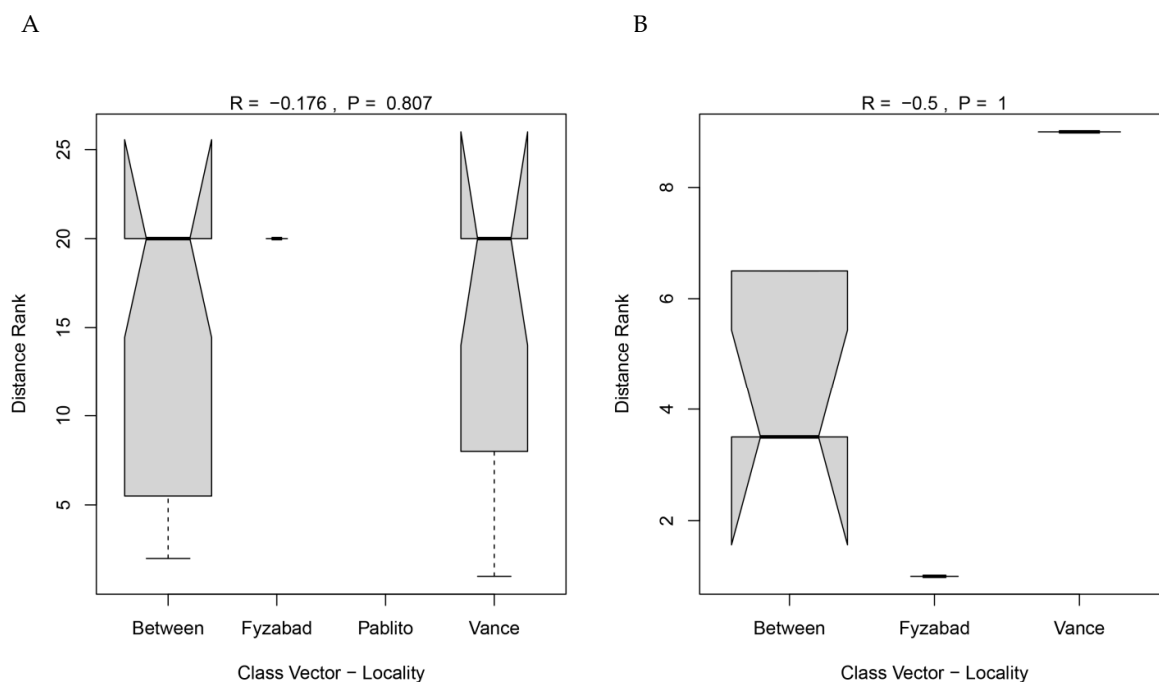

**Figure S4:** ANOSIM analysis for: (A) filamentous fungi and (B) yeast among the locations.

### 1.2. Supplementary Tables

**Table S1:** Quantitative and qualitative characteristics of fungal isolates on 2% oil-amended media. Growth rate is given as diameter/mm/day. \* represents an overgrown culture and no measurement was taken. Visual observations key: eod = excellent oil degradation, lod = little/minor oil degradation, god = good oil degradation, pod = poor oil degradation, nod = no oil degradation, d = oil droplets, r = ring of clearance around fungi, b = oil blobs, p = oil pusher, w = waves in oil and r of oil = ring of oil. Isolate being selected as a top performer for identification is indicated by Y = Yes. Isolates not selected as top performers are indicated by N = no.

| Site | Isolate No. | Growth rate on PDA | Observation   | Growth rate on BHA | Observation | Keep |
|------|-------------|--------------------|---------------|--------------------|-------------|------|
| P    | 1           | 4.32               | god           | 0.41               | god         | N    |
|      | 2           | 10.63              | pod           | 9.80               | pod         | Y    |
|      | 3           | 2.36               | god           | 2.91               | god         | Y    |
|      | 4           | 1.84               | eod           | 2.84               | eod         | Y    |
|      | 5           | 2.13               | r, eod        | 1.48               | r, eod      | N    |
|      | 6           | 2.17               | r, eod        | 2.14               | r, eod      | Y    |
| F1   | 1           | 11.31              | p, oil ring   | 7.78               | d, lod      | Y    |
|      | 2           | 4.60               | d, b, eod     | 2.22               | d, r, god   | Y    |
|      | 3           | *                  | lod, v tiny d | 14.91              | d, god      | N    |
|      | 4           | 10.02              | b, god        | 7.59               | d, lod      | Y    |
|      | 5           | 6.69               | god           | 4.91               | d, b        | Y    |
|      | 6           | 5.29               | god           | 3.74               | d, b, lod   | Y    |
|      | 7           | 3.83               | god           | 1.96               | d, r, lod   | Y    |
|      | 8           | 3.60               | b, lod        | 1.46               | d, r, god   | N    |
|      | 9           | 6.41               | r, god        | 1.71               | god         | Y    |

|     |      |                  |       |                  |   |
|-----|------|------------------|-------|------------------|---|
| 10  | 6.65 | d, eod           | 5.45  | d, lod           | N |
| 11  | 6.90 | r, d, eod        | 1.73  | god              | N |
| 12  | 6.39 | r, d, b, god     | 1.45  | r, god           | N |
| 13  | 4.76 | r, d, god        | 1.65  | d, r, god        | N |
| 14  | 6.48 | d, god           | 2.27  | d, r, god        | N |
| 15  | 5.16 | p, really god    | 5.22  | b, lod           | Y |
| 16  | 6.66 | god              | 5.53  | d, god           | Y |
| 17  | 3.52 | eod              | 2.22  | d                | N |
| 18  | 6.27 | god              | 5.62  | d, b, lod        | Y |
| 19  | 3.05 | eod              | 1.43  | d, r, god        | N |
| 20  | 7.23 | p, eod           | 6.75  | d, lod           | Y |
| 21  | 3.31 | b, r, god        | 1.36  | d, r, god        | N |
| 22  | 2.06 | r, god           | 1.90  | d, b, lod        | Y |
| 23  | 5.14 | r, eod           | 6.30  | d, r, god        | Y |
| 24  | 3.98 | really god       | 1.06  | d, r, god        | N |
| 25  | *    | d, eod           | 14.91 | d, r, god        | Y |
| 26  | 4.04 | r, d, really god | 3.50  | d, r, god        | Y |
| 27  | 6.20 | r, d, god        | 5.42  | d, b             | Y |
| 28  | 1.34 | NOB              | 0.85  | d, god           | Y |
| 29  | 7.88 | r, d, b, god     | 5.01  | d, lod           | Y |
| 30  | 5.48 | r, d, god        | 5.04  | d, god, r of oil | Y |
| 31  | *    | god              | *     | r, d, lod        | Y |
| 32  | *    |                  | *     | d, b, r, lod     | Y |
| 33  | 7.00 | d, eod           | 7.95  | d, b, r, lod     | Y |
| 34  | *    |                  | *     | r, lod           | Y |
| 35  | 3.35 | r, d, god        | 3.76  | d, b, r          | Y |
| 36  | 6.58 | god              | 5.27  | d, b, r          | Y |
| 37  | 6.43 | p, eod           | 5.45  | d, b, lod        | Y |
| 37A | 9.05 | god              | 11.77 | d, b, lod        | Y |
| 38  | 3.86 | r, eod           | 1.78  | d, god           | Y |
| 39  | 2.19 | p, r, god        | 1.61  | d, lod           | N |
| 40  | *    | god              | 11.74 | d, r, god        | Y |
| 41  | 2.66 | r, b, lod        | 2.10  | d, r, god        | N |
| 42  | 7.67 | r, god           | 8.18  | d, b, r, lod     | Y |
| 43  | 5.35 | r, d, really god | 5.14  | b, god           | Y |
| 44  | 9.52 | d, lod           | 8.46  | d, b             | Y |
| 45  | 1.90 | r, d, god        | 3.91  | d, b, lod        | Y |
| 46  | 3.15 | r, d, eod        | 4.42  | p, d, b          | Y |

|    |    |       |                  |       |              |   |
|----|----|-------|------------------|-------|--------------|---|
| F2 | 47 | 11.88 | b, lod           | 6.85  | d, god       | Y |
|    | 48 | 3.40  | r, p, really god | 3.57  | d, god       | Y |
|    | 49 | 1.88  | lod              | 1.94  | d, b, lod    | Y |
|    | 1  | 5.46  | r, d, god        | 3.83  | d, god       | Y |
|    | 1A | 8.59  | r, god           | 7.61  | d,r, god     | Y |
|    | 2  | 8.74  | r, lod           | 8.55  | b, d, r, lod | Y |
|    | 3  | 5.75  | god              | 1.56  | d, r, god    | N |
|    | 4  | 8.39  | r, god           | 7.61  | b, d, r, god | Y |
|    | 5  | 1.63  | r, really god    | 1.17  | d, god       | N |
|    | 5A | 13.25 | lod              | 13.72 | d, b, lod    | Y |
|    | 5B | 1.80  | r, eod           | 1.90  | d, god       | N |
|    | 6  | 6.23  | really god       | 6.23  | d, b, lod    | Y |
|    | 7  | 1.91  | r, eod           | 1.82  | d, god       | Y |
|    | 8  | 1.36  | r, NOB           | 1.68  | d, god       | N |
| V1 | 1  | 5.23  | lod              | 4.68  | w, r         | Y |
| V2 | 2  | 4.63  | r, god           | 3.23  | nod          | Y |
|    | 3  | 10.29 | god              | 11.80 | d, nod       | Y |
|    | 4  | 4.78  | r, god           | 4.05  | nod          | Y |
|    | 5  | 3.36  | god              | 2.95  | god          | Y |
|    | 1  | 3.68  | r, god           | 4.29  | d, b, lod    | Y |
|    | 1* | -     | -                | 4.41  | d, lod       | N |
|    | 1A | -     | -                | 5.10  | d, b, r, lod | N |
|    | 2  | 2.36  | god              | 2.21  | d, r, god    | N |
|    | 3  | 3.95  | god              | 2.11  | d, r, god    | N |
|    | 4  | 13.80 | lod              | 3.94  | d, r, god    | Y |
|    | 5  | 3.52  | god              | 4.72  | d, r, god    | Y |
|    | 6  | 5.91  | god              | 1.93  | d, r, god    | N |
|    | 7  | 1.34  | god              | 1.00  | d, r, god    | N |
|    | 1  | 6.09  | god              | 3.95  | d, w, nod    | Y |
|    | 2  | 4.30  | p, eod           | 3.70  | d, w, nod    | Y |
| V3 | 3  | 7.32  | god              | 5.25  | d, w, nod    | Y |
|    | 4  | 6.75  | god              | 5.52  | d, nod       | Y |
|    | 5  | 4.00  | god              | 3.70  | d, w, nod    | Y |
|    | 6  | 5.39  | god              | 1.91  | eod          | N |
|    | 7  | 7.00  | god              | 2.50  | d, god       | N |
|    | 8  | 6.73  | god              | 5.89  | d, nod       | Y |
|    | 9  | 4.55  | w, r,god         | 1.39  | z, nod       | N |
|    | 10 | 6.09  | god              | 4.30  | p, d, nod    | Y |

|       |     |       |            |       |               |   |
|-------|-----|-------|------------|-------|---------------|---|
|       | 11  | 7.05  | god        | 3.72  | d, b, nod     | Y |
|       | 12  | 7.18  | lod        | 5.02  | d, nod        | Y |
|       | 13  | 4.77  | god        | 1.68  | nod           | N |
|       | 14  | 6.76  | god, r     | 6.02  | d, nod        | Y |
|       | 15  | 5.43  | god, r     | 5.59  | d, nod        | Y |
|       | 16  | 2.20  | god        | 2.66  | d, nod        | N |
|       | 17  | 4.41  | god        | 3.97  | d, b, r, nod  | Y |
|       | 18  | 5.98  | god, r     | 5.10  | d, nod        | Y |
|       | 19  | 12.03 | god        | 5.53  | d, nod        | Y |
| V4    | 1   | 4.79  | eod        | 6.89  | d             | Y |
|       | 2   | 3.20  | eod        | 3.39  | nod           | N |
|       | 3   | 6.27  | eod        | 7.11  | nod           | Y |
|       | 3*  | -     | -          | 5.11  | d, nod        | N |
|       | 4   | 5.32  | eod        | 2.82  | p             | Y |
|       | 5   | 2.59  | eod        | 2.48  | r, eod        | N |
|       | 6   | 4.10  | eod        | 3.98  | w             | Y |
|       | 7   | 2.66  | eod        | 2.86  | r, eod        | N |
| V5    | 1   | 6.26  | really eod | 4.14  | d, nod        | Y |
|       | 2   | 4.77  | d, r, god  | 5.07  | d, nod        | Y |
|       | 3   | 7.77  | god        | 8.16  | v tiny d, nod | Y |
|       | 4   | 3.91  | really eod | 4.64  | p, w          | Y |
|       | 5   | 6.30  | r, god     | 4.70  | d, lod        | Y |
|       | 6   | 8.18  | god        | 9.91  | w, d          | Y |
|       | 7   | 4.25  | eod        | *     | w, d          | Y |
|       | 8   | 5.59  | eod        | 4.36  | p, lod        | Y |
|       | 9   | 1.39  | eod        | 5.20  | d, nod        | Y |
|       | 10  | *     | god        | *     | p, d, lod     | Y |
|       | 11  | 4.87  | god        | 6.00  | d, r, nod     | N |
|       | 11* |       |            | 5.84  | r, nod        | Y |
|       | 12  | 4.98  | god        | 7.91  | r, nod        | Y |
|       | 12* |       |            | 8.00  | d, lod        | Y |
|       | 13  | 7.93  | really god | 5.82  | r, nod        | Y |
|       | 13A | 7.89  | lod        | 11.68 | v tiny d, r   | Y |
|       | 14  | 4.25  | god        | 4.86  | d, nod        | Y |
|       | 15  | *     | god        | *     | d, p?         | Y |
|       | 16  | 4.18  | r, eod     | 4.41  | d, nod        | Y |
|       | 16* | -     | -          | 4.39  | w, god        | Y |
| Total | 128 |       |            |       |               |   |

**Table S2:** Visual observations of bacterial co-culture isolates on 2% oil-amended media. R2A media supported bacterial growth and PDA supported yeast growth. Visual characterization key: z = zones of clearance by bacteria, nz = no zone clearance by bacteria, sz = small zone of clearance by bacteria, bz = big zone of clearance by bacteria, NOB = no oil behind bacteria and r of oil = ring of oil. Zones of clearance key: \* = small zone of clearance, \*\* = medium zone of clearance, \*\*\* = massive zone of clearance, \*\*\*\* = entire plate cleared, negative sign = no zone of clearance but growth was greater in this media and x = no zone of clearance and growth was similar.

|      |             | R2A              |                                 |         |        | PDA              |         |      |
|------|-------------|------------------|---------------------------------|---------|--------|------------------|---------|------|
|      |             | Characterization |                                 | Ranking |        | Characterization | Ranking |      |
| Site | Isolate No. | Ab               | w/o Ab                          | Ab      | w/o Ab | Ab               | Ab      | Keep |
| P    | 1           | z                | nz, NOB, r of oil               | *       |        | z                |         | Y    |
| F1   | 1           | NOB              | NOB                             | -       |        | nz, r            |         | Y    |
|      | 2           | nz, NOB          | NOB                             |         | -      | nz, r            |         | Y    |
|      | 3           | z                | z, NOB                          |         | **     | z                | **      | Y    |
|      | 4           | NOB              | NOB                             | -       |        | nz, NOB, r       |         | Y    |
|      | 5           | nz, NOB          | NOB                             | -       |        | z                | **      | Y    |
|      | 6           | bz               | bz                              |         | ***    | bz               | ****    | Y    |
|      | 7           | nz, NOB          | NOB, r of oil around            |         | -      | nz, r, NOB       |         | Y    |
|      | 8           | NOB              | NOB, r of oil around            | x       | x      | nz, NOB, r       |         | Y    |
|      | 9           | d, bz            | nz, god                         | **      |        | bz               | ****    | Y    |
|      | 10          | very bz          | bz                              | ***     |        | bz               | ****    | Y    |
| F2   | 11          | bz               | bz, lod                         | **      |        | bz               | ****    | Y    |
|      | 12          | bz               | nz, lod                         | **      |        | bz               | ****    | Y    |
|      | 1           | NOB, r of oil    | NOB, r of oil                   | -       |        | nz, NOB, r       |         | Y    |
|      | 2           | NOB, r of oil    | NOB                             | -       |        | nz, NOB, r       |         | Y    |
|      | 3           | NOB, r of oil    | NOB                             | -       |        | nz, NOB, r       |         | Y    |
|      | 4           | bz               | z                               | **      |        | bz               | ****    | Y    |
|      | 5           | nz, NOB          | NOB, r of oil                   | x       | x      | nz, NOB          |         | Y    |
|      | 6           | bz, NOB          | NOB, r of oil                   | **      |        | nz               |         | Y    |
|      | 7           | z                | massive z, oil eaten and pushed |         | ****   | z                | **      | Y    |
|      | 8           | lod              | bz, r of oil lod                |         | **     | bz               | ****    | Y    |
| V1   | 9           | NOB, r of oil    | NOB, r of oil                   | x       | x      | nz, NOB, r       |         | Y    |
|      | 10          | z                | z                               | **      |        | bz               | ****    | Y    |
|      | 1           | z                | massive z                       |         | ****   | z                | **      | Y    |
|      | 2           | z                | massive z                       | ***     |        | z                | **      | Y    |
|      | 2           | z                | massive z                       |         | ****   | z                | **      | Y    |
|      | 1           | z                | massive z                       |         | ****   | nz               |         | Y    |
|      | 2           | bz               | r of oil, lod                   | **      |        | bz               | ***     | Y    |
|      |             |                  |                                 |         |        |                  |         |      |
|      |             |                  |                                 |         |        |                  |         |      |
|      |             |                  |                                 |         |        |                  |         |      |



|       |    |                             |                                      |    |      |    |    |   |
|-------|----|-----------------------------|--------------------------------------|----|------|----|----|---|
| V4    | 1  | nz                          | nz, NOB, r<br>of oil, sd             | -  |      | nz |    | Y |
|       | 2  | bz                          | r of oil,<br>NOB                     | ** |      | z  | ** | Y |
|       | 3  | NOB                         | r of oil,<br>NOB                     | *  |      | z  | *  | Y |
| V5    | 1  | bz- 90%<br>plate<br>cleared | massive z,<br>95 % plate<br>c no oil |    | **** | z  | ** | Y |
|       | 2  | z                           | massive z,<br>95 % plate<br>c no oil |    | **** | nz |    | Y |
| Total | 33 |                             |                                      |    |      |    |    |   |

**Table S3:** Identification of filamentous fungi in the final dataset from 8 sites in southwestern Trinidad. GenBank accession information is provided where two references are provided per species. The placement of filamentous fungi into respective taxonomic levels was aided by the National Center for Biotechnology Information (NCBI) Taxonomy browser (<https://www.ncbi.nlm.nih.gov/Taxonomy/Browser/wwwtax.cgi>).

| Site | Isolate No. | QC%/ID%   | Species                                                                                                                                                                               | Phyla      | Class           | Accession | Country | Host/source        |
|------|-------------|-----------|---------------------------------------------------------------------------------------------------------------------------------------------------------------------------------------|------------|-----------------|-----------|---------|--------------------|
| P    | 2           | 99/99.82  | <i>Eutypella scoparia</i>                                                                                                                                                             | Ascomycota | Sordariomycetes | KP269015  | China   | Seaweeds           |
|      |             | 99/100    |                                                                                                                                                                                       |            |                 | MK336539  | Taiwan  | Ipomoea pes-caprae |
|      | 3           | 100/99.43 | <i>Roussoella solani</i>                                                                                                                                                              | Ascomycota | Dothideomycetes | LC195220  | Japan   |                    |
|      |             |           |                                                                                                                                                                                       |            |                 | LC195219  | Japan   |                    |
|      | 4           | 99/99.46  | <i>Roussoella solani</i>                                                                                                                                                              | Ascomycota | Dothideomycetes |           |         |                    |
|      | 6           | 100/99.62 | <i>Cladosporium cladosporioides/pseudocladosporioides/subuliforme/allicinum/delicatulum/australiense/angustisporum/inversicolor/westerdijkiae/uwebrauniana/europaeum/anthrophilum</i> | Ascomycota | Dothideomycetes |           |         |                    |
| F1   | 1           | 100/99.62 | <i>Fusarium chlamydosporum</i>                                                                                                                                                        | Ascomycota | Dothideomycetes |           |         |                    |
|      | 2           | 100/100   | <i>Aspergillus alabamensis</i>                                                                                                                                                        | Ascomycota | Sordariomycetes | KP987071  | USA     | Human/wound        |
|      |             |           |                                                                                                                                                                                       |            |                 | MG461687  | China   | Ceramium japonicum |
|      | 4           | 100/100   | <i>Aspergillus caelatus</i>                                                                                                                                                           | Ascomycota | Eurotiomycetes  | KM613140  | Brazil  | Soil               |
|      |             |           |                                                                                                                                                                                       |            |                 | AF004930  | USA     | Peanut field soil  |
|      | 5           | 100/100   | <i>Aspergillus aculeatus</i>                                                                                                                                                          | Ascomycota | Eurotiomycetes  |           |         |                    |
|      | 6           | 100/100   | <i>Aspergillus alabamensis</i>                                                                                                                                                        | Ascomycota | Eurotiomycetes  |           |         |                    |
|      | 7           | 100/99.63 | <i>Talaromyces angelicus</i>                                                                                                                                                          | Ascomycota | Eurotiomycetes  | LT899791  | Spain   | Dung               |

|    |           |                                                                        |            |                 |          |             |                           |      |
|----|-----------|------------------------------------------------------------------------|------------|-----------------|----------|-------------|---------------------------|------|
|    |           |                                                                        |            |                 |          | LT899792    | Spain                     | Dung |
| 9  | 100/100   | <i>Penicillium janthinellum/brefeldianum</i>                           | Ascomycota | Eurotiomycetes  |          |             |                           |      |
| 15 | 100/100   | <i>Aspergillus</i><br><i>udagawae/wyomingensis/Neosartorya aureola</i> | Ascomycota | Eurotiomycetes  | LC317463 | Japan       |                           |      |
|    |           |                                                                        |            |                 | KY808744 | Australia   |                           |      |
| 16 | 100/100   | <i>Aspergillus</i><br><i>udagawae/wyomingensis/Neosartorya aureola</i> | Ascomycota | Eurotiomycetes  |          |             |                           |      |
| 18 | 100/100   | <i>Aspergillus</i><br><i>udagawae/wyomingensis/Neosartorya aureola</i> | Ascomycota | Eurotiomycetes  |          |             |                           |      |
| 20 | 100/99.62 | <i>Fusarium chlamydosporum</i>                                         | Ascomycota | Eurotiomycetes  | KX421422 | Brazil      | Chrysomelidae sp.         |      |
|    |           |                                                                        |            |                 | MN882831 | Nigeria     | Dried food                |      |
| 22 | 98/100    | <i>Penicillium rubidurum</i>                                           | Ascomycota | Eurotiomycetes  | KP055596 | South Korea | Crop field soil           |      |
|    |           |                                                                        |            |                 | HQ607978 | USA         | Cyphomyrmex wheeleri nest |      |
| 23 | 100/100   | <i>Microsphaeropsis arundinis</i>                                      | Ascomycota | Dothideomycetes | MH911414 | India       | Loktak Lake               |      |
|    |           |                                                                        |            |                 | MH911394 | India       | Loktak Lake               |      |
| 25 | 100/100   | <i>Trichoderma reesei</i>                                              | Ascomycota | Sordariomycetes |          |             |                           |      |
| 26 | 100/97.02 | <i>Pyrenochaetopsis indica</i>                                         | Ascomycota | Dothideomycetes | LT623224 | India       | Saccharum officinarum     |      |

|     |           |                                                                    |               |                 |           |           |                          |
|-----|-----------|--------------------------------------------------------------------|---------------|-----------------|-----------|-----------|--------------------------|
|     |           |                                                                    |               |                 | NR_160058 | Spain     |                          |
| 27  | 100/99.82 | <i>Aspergillus udagawae/aureolus/wyomingensis</i>                  | Ascomycota    | Eurotiomycetes  |           |           |                          |
| 28  | 100/100   | <i>Aspergillus alabamensis</i>                                     | Ascomycota    | Eurotiomycetes  |           |           |                          |
|     |           | <i>Aspergillus</i>                                                 |               |                 |           |           |                          |
| 29  | 100/100   | <i>udagawae/wyomingensis/Neosartorya aureola/fischeri</i>          | Ascomycota    | Eurotiomycetes  |           |           |                          |
| 31  | 100/99.84 | <i>Trichoderma reesei/Hypocrea jecorina</i>                        | Ascomycota    | Sordariomycetes |           |           |                          |
| 32  | 100/99.84 | <i>Trichoderma reesei/Hypocrea jecorina</i>                        | Ascomycota    | Sordariomycetes |           |           |                          |
|     |           | <i>Aspergillus</i>                                                 |               |                 |           |           |                          |
| 33  | 100/100   | <i>aculeatus/japonicus/fijiensis/brunneoviolaceus/as siutensis</i> | Ascomycota    | Eurotiomycetes  | KR296861  | Singapore | Soil                     |
|     |           |                                                                    |               |                 | MK392046  | China     |                          |
| 34  | 100/100   | <i>Trichoderma reesei/Hypocrea jecorina</i>                        | Ascomycota    | Eurotiomycetes  | JQ411369  | Panama    | Marine sponge            |
|     |           |                                                                    |               |                 | KM246746  | Malaysia  |                          |
| 35  | 100/97    | <i>Pyrenochaetopsis indica</i>                                     | Ascomycota    | Dothideomycetes |           |           |                          |
| 36  | 100/100   | <i>Talaromyces flavus var. flavus/muroii</i>                       | Ascomycota    | Eurotiomycetes  |           |           |                          |
|     |           | <i>Aspergillus</i>                                                 |               |                 |           |           |                          |
| 37  | 100/100   | <i>udagawae/wyomingensis/Neosartorya aureola/fischeri</i>          | Ascomycota    | Eurotiomycetes  |           |           |                          |
|     |           | <i>Fusarium</i>                                                    |               |                 |           |           |                          |
| 37A | 100/100   | <i>proliferatum/verticillioides/oxysporum/fujikuroi/mexicanum</i>  | Ascomycota    | Eurotiomycetes  |           |           |                          |
|     |           | <i>/napiforme/pseudocircinatum/Curvularia senegalensis</i>         |               |                 |           |           |                          |
| 38  | 100/99.83 | <i>Aspergillus alabamensis</i>                                     | Ascomycota    | Eurotiomycetes  |           |           |                          |
| 40  | 100/99.83 | <i>Phanerochaete chrysosporium/concrescens</i>                     | Basidiomycota | Agaricomycetes  | KC881189  | Argentina | Platanus acerifolia/wood |
|     |           |                                                                    |               |                 | GQ280374  | Mexico    | Wood wastes              |

|     |           |                                                  |            |                 |          |             |                                                  |
|-----|-----------|--------------------------------------------------|------------|-----------------|----------|-------------|--------------------------------------------------|
| 42  | 100/100   | <i>Cochliobolus geniculatus/asianensis</i>       | Ascomycota | Dothideomycetes | JQ783058 | Brazil      | Seedling sugarcane                               |
|     |           |                                                  |            |                 | JN943417 | Japan       | Leaves                                           |
| 43  | 99/99.77  | <i>Chaetomella raphigera</i>                     | Ascomycota | Leotiomycetes   | KF193633 | China       | Leaves                                           |
|     |           |                                                  |            |                 | AY487076 | USA         |                                                  |
| 44  | 99/98.05  | <i>Stagonospora bicolor</i>                      | Ascomycota | Dothideomycetes |          |             |                                                  |
| 46  | 99/97.17  | <i>Pyrenochaetopsis indica</i>                   | Ascomycota | Dothideomycetes |          |             |                                                  |
| 47  | 100/98.06 | <i>Stagonospora bicolor/Saccharicola bicolor</i> | Ascomycota | Eurotiomycetes  | MK102692 | China       | Stipa purpurea/root                              |
|     |           |                                                  |            |                 | MK102691 | China       | Stipa purpurea/root                              |
| 48  | 100/100   | <i>Aspergillus terreus</i>                       | Ascomycota | Eurotiomycetes  | KP987086 | China       | Waste cloth                                      |
|     |           |                                                  |            |                 | JF738047 | China       |                                                  |
| 49  | 100/95.70 | <i>Neosascochyta paspali</i>                     | Ascomycota | Dothideomycetes | MH861378 | New Zealand |                                                  |
|     |           |                                                  |            |                 | MN077412 | New Zealand | Ranunculus acris/<br>leaf, symptomless<br>tissue |
| F 2 | 1         | 81/93.61                                         | Ascomycota | Dothideomycetes | KR909137 | USA         | Grapevine/wood                                   |
|     |           |                                                  |            |                 | JX456476 | Greece      | Phoenix<br>theophrasti/leaves                    |

|    |          |                                                                                                                                |               |                 |          |           |                            |
|----|----------|--------------------------------------------------------------------------------------------------------------------------------|---------------|-----------------|----------|-----------|----------------------------|
| 1A | 100/100  | <i>Epicoccum sorghinum/latusicollum/thailandicum/Cochliobolus kusanoi=Curvularia kusanoi/Phoma herbarum/Fusarium oxysporum</i> | Ascomycota    | Dothideomycetes | MF580966 | China     | Macadamia                  |
|    |          |                                                                                                                                |               |                 | KX171660 | Denmark   | Sorghum bicolor/root       |
| 2  | 100/100  | <i>Epicoccum sorghinum/Cochliobolus kusanoi=Curvularia kusanoi/Phoma herbarum</i>                                              | Ascomycota    | Dothideomycetes |          |           |                            |
| 4  | 100/100  | <i>Epicoccum sorghinum/latusicollum/thailandicum Cochliobolus kusanoi=Curvularia kusanoi/Phoma herbarum/Fusarium oxysporum</i> |               |                 |          |           |                            |
| 6  | 99/99.84 | <i>Phlebiopsis flavidoalba/ Oudemansiella canarii</i>                                                                          | Basidiomycota | Agaricomycetes  | KP135404 | USA       | Hardwood                   |
|    |          |                                                                                                                                |               |                 | MG751231 | Brazil    | Hevea brasiliensis         |
| 7  | 100/100  | <i>Cladosporium sphaerospermum/Cladosporium halotolerans</i>                                                                   | Ascomycota    | Dothideomycetes | KX958086 | Japan     | Sediment below ocean floor |
|    |          |                                                                                                                                |               |                 | KP269061 | China     | Seaweeds                   |
| V1 | 1        | 100/93.06                                                                                                                      | Basidiomycota | Agaricomycetes  |          |           |                            |
|    | 2        | 100/93.07                                                                                                                      | Basidiomycota | Agaricomycetes  |          |           |                            |
|    | 3        | 100/93.08                                                                                                                      | Basidiomycota | Agaricomycetes  | FJ627262 | China     |                            |
|    |          |                                                                                                                                |               |                 | KX778655 | China     | Fishscale bamboo           |
|    | 4        | 100/100                                                                                                                        | Ascomycota    | Eurotiomycetes  | KM369868 | India     | Mangrove rhizosphere soil  |
|    |          |                                                                                                                                |               |                 | KJ207393 | Hong Kong | Sticks in soil             |
| 5  | 100/100  | <i>Cladosporium cladosporioides</i>                                                                                            | Ascomycota    | Dothideomycetes | HQ327999 | China     |                            |

|    |    |           |                                                                                                                      |            |                 |          |               |                                 |
|----|----|-----------|----------------------------------------------------------------------------------------------------------------------|------------|-----------------|----------|---------------|---------------------------------|
|    |    |           |                                                                                                                      |            |                 | KU707926 | India         | Metal rich<br>rhizospheric soil |
| V2 | 1  | 100/99.83 | <i>Scedosporium dehoogii</i> / <i>Pseudallescheria boydii</i>                                                        | Ascomycota | Sordariomycetes |          |               |                                 |
|    | 4  | 100/98.51 | <i>Periconia thailandica</i>                                                                                         | Ascomycota | Dothideomycetes | KY753887 | Thailand      | Decaying bamboo                 |
|    |    | 95/99     |                                                                                                                      |            |                 | MN398986 | Vietnam       |                                 |
|    | 5  | 100/99.83 | <i>Scedosporium dehoogii</i>                                                                                         | Ascomycota | Sordariomycetes | KP132700 | France        |                                 |
|    |    |           |                                                                                                                      |            |                 | KX664394 | USA           | Floor surface                   |
| V3 | 1  | 100/99.62 | <i>Talaromyces flavus</i> / <i>flavus</i> var. <i>flavus</i>                                                         | Ascomycota | Eurotiomycetes  | JN602366 | China         |                                 |
|    |    |           |                                                                                                                      |            |                 | JX677940 | Myanmar       | Paddy soil                      |
|    | 2  | 100/99.82 | <i>Penicillium shearii</i>                                                                                           | Ascomycota | Eurotiomycetes  |          |               |                                 |
|    | 3  | 100/99.82 | <i>Talaromyces flavus</i> / <i>Talaromyces pinophilus</i><br>(formerly <i>Penicillium pinophilum</i> )/ <i>liani</i> | Ascomycota | Eurotiomycetes  | AF033420 | USA           |                                 |
|    |    |           |                                                                                                                      |            |                 | MH858867 | Cote d'Ivoire |                                 |
|    | 4  | 100/100   | <i>Talaromyces flavus</i> var. <i>flavus</i>                                                                         | Ascomycota | Eurotiomycetes  |          |               |                                 |
|    | 5  | 100/100   | <i>Penicillium shearii</i>                                                                                           | Ascomycota | Eurotiomycetes  |          |               |                                 |
|    |    |           | <i>Penicillium</i>                                                                                                   |            |                 |          |               |                                 |
|    | 8  | 100/98.93 | <i>janthinellum</i> / <i>levitum</i> / <i>reticulisporum</i> / <i>ludwigii</i> / <i>eh<br/>rlichii</i>               | Ascomycota | Eurotiomycetes  |          |               |                                 |
|    | 10 | 100/99.82 | <i>Penicillium citrioviride</i>                                                                                      | Ascomycota | Eurotiomycetes  |          |               |                                 |
|    | 11 | 100/100   | <i>Penicillium janthinellum</i> / <i>javanicum</i>                                                                   | Ascomycota | Eurotiomycetes  |          |               |                                 |
|    | 12 | 100/100   | <i>Talaromyces flavus</i> var. <i>flavus</i> / <i>muroii</i>                                                         | Ascomycota | Eurotiomycetes  | MH857785 | Netherlands   |                                 |
|    |    |           |                                                                                                                      |            |                 | MH857477 | Netherlands   |                                 |





|    |   |           |                                                                                           |              |                 |          |          |                                            |
|----|---|-----------|-------------------------------------------------------------------------------------------|--------------|-----------------|----------|----------|--------------------------------------------|
| V5 |   |           |                                                                                           |              |                 | EF652146 | USA      | <i>Aspergillus stromatoides</i>            |
|    | 1 | 100/100   | <i>Penicillium javanicum/janthinellum</i>                                                 | Ascomycota   | Eurotiomycetes  |          |          |                                            |
|    | 2 | 100/100   | <i>Penicillium javanicum/janthinellum</i>                                                 | Ascomycota   | Eurotiomycetes  | MH864718 | Brazil   |                                            |
|    |   |           |                                                                                           |              |                 | KF313084 | Korea    | Pine root                                  |
|    | 3 | 100/100   | <i>Aspergillus nomius</i>                                                                 | Ascomycota   | Eurotiomycetes  | AB828718 | Thailand | Soil contaminated palm oil                 |
|    |   |           |                                                                                           |              |                 | MH279387 | Thailand | Bamboo sample                              |
|    | 4 | 100/100   | <i>Penicillium citrinum</i>                                                               | Ascomycota   | Eurotiomycetes  | MG948252 | India    | Soil                                       |
|    |   |           |                                                                                           |              |                 | KT844552 | India    | Rhizospheric soil from agricultural fields |
|    | 5 | 100/100   | <i>Gongronella butleri</i>                                                                | Mucoromycota | Mucoromycetes   | JN942999 | Brazil   | Soil                                       |
|    |   |           |                                                                                           |              |                 | KM405649 | India    | Medicinal plant                            |
|    | 6 | 100/99.80 | <i>Epicoccum sorghinum (syn Epicoccum sorghi)/Phoma herbarum /Epicoccum latusicollum</i>  | Ascomycota   | Dothideomycetes |          |          |                                            |
|    | 7 | 99/97.74  | <i>Penicillium pulvillorum</i>                                                            | Ascomycota   | Eurotiomycetes  | AF178527 | USA      |                                            |
|    |   |           |                                                                                           |              |                 | KF624805 | USA      | Ant mound                                  |
|    | 8 | 99/100    | <i>Penicillium javanicum/janthinellum</i>                                                 | Ascomycota   | Eurotiomycetes  |          |          |                                            |
|    | 9 | 100/100   | <i>Pyrenochaetopsis microspora/americana/Dokmaia montheadangii /Melanomma lichenicola</i> | Ascomycota   | Dothideomycetes | MK508814 | Brazil   | Leaves of coconut crops                    |

|     |           |                                                                 |            |                 |           |              |                               |
|-----|-----------|-----------------------------------------------------------------|------------|-----------------|-----------|--------------|-------------------------------|
|     |           |                                                                 |            |                 | NR_160059 | USA          |                               |
| 10  | 100/100   | <i>Trichoderma asperellum/asperelloides/yunnanense /hamatum</i> | Ascomycota | Sordariomycetes | MK086064  | Brazil       | Soil                          |
|     |           |                                                                 |            |                 | MN639282  | Mexico       | Soil                          |
| 11  | 100/99.41 | <i>Curvularia kusanoi</i>                                       | Ascomycota | Dothideomycetes | JN943395  | Japan        | Eragrostis multicaulis/leaves |
|     |           |                                                                 |            |                 | MG847354  | China        | Oedaleus infernalis Sauss gut |
| 12  | 100/100   | <i>Phoma herbarum/Epicoccum sorghinum/Cochliobolus kusanoi</i>  | Ascomycota | Dothideomycetes |           |              |                               |
| 12* | 100/100   | <i>Phoma herbarum/Epicoccum sorghinum/Cochliobolus kusanoi</i>  | Ascomycota | Dothideomycetes | KY780194  | China        | Leaf                          |
|     |           |                                                                 |            |                 | KU204761  | South Africa | Endophytes                    |
| 13  | 100/100   | <i>Talaromyces pinophilus/funiculosus/cellulolyticus</i>        | Ascomycota | Eurotiomycetes  | LC199384  | Denmark      | Deep sea sediment             |
|     |           |                                                                 |            |                 | KY965441  | China        | Roots of Dalbergia odorifera  |
| 13A | 100/100   | <i>Neocosmospora rubicola</i>                                   | Ascomycota | Sordariomycetes | KY283805  | China        | Orchid                        |
| 14  | 100/100   | <i>Myrothecium gramineum</i>                                    | Ascomycota | Sordariomycetes | FJ825374  | Thailand     |                               |
|     |           |                                                                 |            |                 | JQ936266  | Brazil       | Soybean/leaves                |
| 15  | 100/99.83 | <i>Trichoderma reesei=Hypocrea jecorina</i>                     | Ascomycota | Sordariomycetes |           |              |                               |
| 16  | 99/99.64  | <i>Myrothecium roridum</i>                                      | Ascomycota | Sordariomycetes | JF724155  | Brazil       | Leaf                          |

|              |                          |           |                                    |               |                 |          |             |                                     |
|--------------|--------------------------|-----------|------------------------------------|---------------|-----------------|----------|-------------|-------------------------------------|
|              |                          |           |                                    |               |                 | AJ302001 | Germany     |                                     |
|              | 16*                      | 100/99.82 | <i>Myrothecium roridum</i>         | Ascomycota    | Sordariomycetes |          |             |                                     |
|              | Isolates from co-culture |           |                                    |               |                 |          |             |                                     |
| P            | 1                        | 99/98.23  | <i>Sydowia sp.</i>                 | Ascomycota    | Dothideomycetes | MF683457 | New Zealand | Kunzea ericoides                    |
| F1           | 2                        | 99/76.90  | <i>Phanerochaete chrysosporium</i> | Basidiomycota | Agaricomycetes  |          |             |                                     |
| F2           | 7                        | 6/95.12   | <i>Phytophthora cinnamomi</i>      | Oomycota      | Oomycetes       | EU170011 | Australia   |                                     |
| V3           | 1                        | 92/100    | <i>Aspergillus gracilis</i>        | Ascomycota    | Eurotiomycetes  | MF920422 | Antarctica  | Human impacted soil                 |
|              |                          |           |                                    |               |                 | MF692973 | Antarctica  | Pristine soil                       |
|              | 2                        | 75/77.88  | <i>Rhizopus oryzae</i>             | Mucoromycota  | Mucoromycetes   | EU862193 | China       | Traditional soy paste and soy sauce |
| V5           | 1                        | 73/82.48  | <i>Aspergillus sydowii</i>         | Ascomycota    | Eurotiomycetes  | MH464419 | China       | During fermentation                 |
|              |                          |           |                                    |               |                 | MK828710 | Nigeria     | Untreated refinery wastewater       |
| <b>Total</b> | <b>96</b>                |           |                                    |               |                 |          |             |                                     |

**Table S4:** Identification of bacterial dataset from 8 sites in southwestern Trinidad. GenBank accession information is provided where two references are provided per species. The placement of bacteria into respective taxonomic levels was aided by the National Center for Biotechnology Information (NCBI) Taxonomy browser (<https://www.ncbi.nlm.nih.gov/Taxonomy/Browser/wwwtax.cgi>).

| Site | Isolate No. | Shape   | Gram reaction | QC%/ID%   | Identity                                                                                    | Phyla          | Class              | Accession | Country | Host/source                                                |
|------|-------------|---------|---------------|-----------|---------------------------------------------------------------------------------------------|----------------|--------------------|-----------|---------|------------------------------------------------------------|
| P    | 1           | Bacilli | -             | 100/99.46 | <i>Janthinobacterium lividum/svalbardensis</i>                                              | Proteobacteria | Betaproteobacteria |           |         |                                                            |
| F1   | 1           | Bacilli | -             | 100/99.78 | <i>Burkholderia anthina/cepacia</i>                                                         | Proteobacteria | Betaproteobacteria | KP216607  | China   | Rhizosphere soil of the different ages Dalbergia Odorifera |
|      |             |         |               |           |                                                                                             |                |                    | JX025731  | India   | Soil                                                       |
|      | 2           | Bacilli | -             | 100/99    | <i>Burkholderia cenocepacia/cepacia</i>                                                     | Proteobacteria | Betaproteobacteria | KY810685  | India   | Root                                                       |
|      |             |         |               |           |                                                                                             |                |                    | EU684748  | China   |                                                            |
|      | 3           | Bacilli | -             | 89/82.45  | <i>Burkholderia gladioli</i>                                                                | Proteobacteria | Betaproteobacteria | KJ670084  | Brazil  | Sugarcane endophytic                                       |
|      |             |         |               |           |                                                                                             |                |                    | MG654707  | China   |                                                            |
|      | 4           | Bacilli | -             | 100/98.33 | <i>Janthinobacterium lividum/svalbardensis</i>                                              | Proteobacteria | Betaproteobacteria |           |         |                                                            |
|      | 5           | Bacilli | -             | 100/99.90 | <i>Burkholderia cepacia/territorii/ambifaria/cepacia/pyrrocinia/metallica/vietnamiensis</i> | Proteobacteria | Betaproteobacteria | MG768915  | Vietnam | Dioxin contaminated soils                                  |
|      |             |         |               |           |                                                                                             |                |                    | MG768914  | Vietnam | Dioxin contaminated soils                                  |

|    |    |         |   |           |                                                |                |                     |           |            |                                            |
|----|----|---------|---|-----------|------------------------------------------------|----------------|---------------------|-----------|------------|--------------------------------------------|
| F2 | 6  | Bacilli | - | 100/99.47 | <i>Chryseobacterium oranimense</i>             | Bacteroidetes  | Flavobacteriia      | NR_044168 | Israel     | Raw milk                                   |
|    |    |         |   |           |                                                |                |                     | MG322209  | Portugal   | Surface water                              |
|    | 7  | Bacilli | - | 100/99.67 | <i>Janthinobacterium lividum/svalbardensis</i> | Proteobacteria | Betaproteobacteria  |           |            |                                            |
|    | 8  | Bacilli | - | 100/100   | <i>Janthinobacterium lividum</i>               | Proteobacteria | Betaproteobacteria  | MG825076  | Antarctica | Hydrocarbon-contaminated soil              |
|    |    |         |   |           |                                                |                |                     | KT923309  | Austria    | Alpine soil-Hydrocarbon-degrading bacteria |
|    | 9  | Bacilli | - | 99/84.49  | <i>Janthinobacterium lividum</i>               | Proteobacteria | Betaproteobacteria  |           |            |                                            |
|    | 10 | Bacilli | - | 100/100   | <i>Janthinobacterium lividum/svalbardensis</i> | Proteobacteria | Betaproteobacteria  |           |            |                                            |
|    | 11 | Bacilli | - | 99/99.69  | <i>Janthinobacterium lividum</i>               | Proteobacteria | Betaproteobacteria  |           |            |                                            |
|    | 12 | Bacilli | - | 100/99.68 | <i>Janthinobacterium lividum/svalbardensis</i> | Proteobacteria | Betaproteobacteria  |           |            |                                            |
|    | 1  | Bacilli | - | 100/97.36 | <i>Janthinobacterium lividum/svalbardensis</i> | Proteobacteria | Betaproteobacteria  |           |            |                                            |
|    | 2  | Bacilli | - | 100/99.15 | <i>Janthinobacterium lividum</i>               | Proteobacteria | Betaproteobacteria  |           |            |                                            |
|    | 3  | Bacilli | - | 99/99.18  | <i>Janthinobacterium lividum</i>               | Proteobacteria | Betaproteobacteria  |           |            |                                            |
|    | 4  | Bacilli | - | 100/99.89 | <i>Janthinobacterium lividum/svalbardensis</i> | Proteobacteria | Betaproteobacteria  |           |            |                                            |
|    | 5  | Bacilli | - | 100/100   | <i>Janthinobacterium lividum</i>               | Proteobacteria | Betaproteobacteria  |           |            |                                            |
|    | 6  | Bacilli | - | 100/99.76 | <i>Janthinobacterium lividum/svalbardensis</i> | Proteobacteria | Betaproteobacteria  |           |            |                                            |
|    | 7  | Bacilli | - | 100/99.69 | <i>Serratia marcescens/nematodiphila</i>       | Proteobacteria | Gammaproteobacteria | KP903465  | China      | Rhizosphere soil of Camellia sinensis      |
|    |    |         |   |           |                                                |                |                     | KM044037  | India      | Soil                                       |

|              |           |         |   |           |                                                |                |                     |          |       |                 |
|--------------|-----------|---------|---|-----------|------------------------------------------------|----------------|---------------------|----------|-------|-----------------|
|              | 8         | Bacilli | - | 100/99.88 | <i>Janthinobacterium lividum/svalbardensis</i> | Proteobacteria | Betaproteobacteria  |          |       |                 |
|              | 9         | Bacilli | - | 99/100    | <i>Janthinobacterium lividum/svalbardensis</i> | Proteobacteria | Betaproteobacteria  |          |       |                 |
|              | 10        | Bacilli | - | 100/100   | <i>Janthinobacterium lividum/svalbardensis</i> | Proteobacteria | Betaproteobacteria  |          |       |                 |
| V1           | 1         | Bacilli | - | 100/97.12 | <i>Janthinobacterium lividum/svalbardensis</i> | Proteobacteria | Betaproteobacteria  |          |       |                 |
| V2           | 1         | Bacilli | - | 100/99.78 | <i>Serratia marcescens/entomophila</i>         | Proteobacteria | Gammaproteobacteria |          |       |                 |
|              | 2         | Bacilli | - | 100/99.49 | <i>Serratia marcescens</i>                     | Proteobacteria | Gammaproteobacteria |          |       |                 |
| V3           | 1         | Bacilli | - | 100/99.68 | <i>Serratia nematodiphila</i>                  | Proteobacteria | Gammaproteobacteria |          |       |                 |
|              | 2         | Bacilli | - | 99/100    | <i>Serratia nematodiphila</i>                  | Proteobacteria | Gammaproteobacteria | GU339284 | Inida |                 |
|              |           |         |   |           |                                                |                |                     | MN691570 | China | Rice paddy soil |
| V4           | 1         | Bacilli | - | 99/88.28  | <i>Janthinobacterium lividum</i>               | Proteobacteria | Betaproteobacteria  |          |       |                 |
|              | 2         | Bacilli | - | 99/95.11  | <i>Janthinobacterium lividum</i>               | Proteobacteria | Betaproteobacteria  |          |       |                 |
|              | 3         | Bacilli | - | 100/100   | <i>Janthinobacterium lividum/svalbardensis</i> | Proteobacteria | Betaproteobacteria  |          |       |                 |
| V5           | 1         | Bacilli | - | 100/99.89 | <i>Serratia marcescens</i>                     | Proteobacteria | Gammaproteobacteria |          |       |                 |
|              | 2         | Bacilli | - | 100/99.79 | <i>Janthinobacterium lividum</i>               | Proteobacteria | Betaproteobacteria  |          |       |                 |
| <b>Total</b> | <b>33</b> |         |   |           |                                                |                |                     |          |       |                 |

**Table S5:** Identification of yeast dataset from 8 sites in southwestern Trinidad. GenBank accession information is provided where two references are provided per species. The placement of yeast into respective taxonomic levels was aided by the National Center for Biotechnology Information (NCBI) Taxonomy browser (<https://www.ncbi.nlm.nih.gov/Taxonomy/Browser/wwwtax.cgi>).

| Site | Isolate No. | QC%/ID%   | Identity                           | Phyla         | Class              | Accession | Country | Host/source                          |
|------|-------------|-----------|------------------------------------|---------------|--------------------|-----------|---------|--------------------------------------|
| F1   | 3           | 81/96.41  | <i>Cryptococcus rajasthanensis</i> | Basidiomycota | Agaricomycetes     | AM262325  | India   | Inflorescence of <i>Digera</i> sp.   |
|      |             |           |                                    |               |                    | HQ832836  | China   | Camellia sinensis/<br>Foliar lesions |
|      | 4           | 100/100   | <i>Rhodotorula mucilaginosa</i>    | Basidiomycota | Microbotryomycetes | KU145520  | Chile   | Soil sample from Snow island         |
|      |             |           |                                    |               |                    | KP132584  | France  |                                      |
|      | 6           | 95/88.75  | <i>Rhodotorula mucilaginosa</i>    | Basidiomycota | Microbotryomycetes |           |         |                                      |
|      | 7           | 100/100   | <i>Rhodotorula mucilaginosa</i>    | Basidiomycota | Microbotryomycetes |           |         |                                      |
|      | 8           | 100/100   | <i>Rhodotorula mucilaginosa</i>    | Basidiomycota | Microbotryomycetes |           |         |                                      |
|      | 9           | 100/99.81 | <i>Lecythophora aff. decumbens</i> | Ascomycota    | Sordariomycetes    | FN428890  | Brazil  | Sugar cane soil                      |
|      |             |           |                                    |               |                    | HQ631011  |         | Saccharum officinarum                |
|      | 10          | 100/99.82 | <i>Lecythophora aff. decumbens</i> | Ascomycota    | Sordariomycetes    |           |         |                                      |
|      | 11          | 100/99.81 | <i>Lecythophora aff. decumbens</i> | Ascomycota    | Sordariomycetes    |           |         |                                      |
|      | 12          | 100/99.64 | <i>Lecythophora aff. decumbens</i> | Ascomycota    | Sordariomycetes    |           |         |                                      |
| F2   | 1           | 100/100   | <i>Rhodotorula mucilaginosa</i>    | Basidiomycota | Microbotryomycetes |           |         |                                      |
|      | 2           | 94/99.80  | <i>Cryptococcus flavescens</i>     | Basidiomycota | Tremellomycetes    | FN428902  | Brazil  | Sugar cane soil                      |
|      |             |           |                                    |               |                    | FN428920  | Brazil  | Sugar cane soil                      |

|              |           |           |                                                             |               |                     |          |          |                                             |
|--------------|-----------|-----------|-------------------------------------------------------------|---------------|---------------------|----------|----------|---------------------------------------------|
|              | 3         | 100/99.18 | <i>Cryptococcus/Papiliotrema aff. laurentii</i>             | Basidiomycota | Tremellomycetes     |          |          |                                             |
|              | 4         | 100/99.44 | <i>Lecythophora aff. decumbens</i>                          | Ascomycota    | Sordariomycetes     |          |          |                                             |
|              | 5         | 100/100   | <i>Cryptococcus laurentii</i>                               | Basidiomycota | Tremellomycetes     | KT899784 | Nigeria  | Crude oil polluted soil                     |
|              |           |           |                                                             |               |                     | JN627015 | Brazil   |                                             |
|              | 6         | 100/100   | <i>Rhodotorula taiwanensis/glutinis</i>                     | Basidiomycota | Microbotryomycetes  | LC486521 | Thailand | Rice leaves ( <i>Oryza sativa</i> )         |
|              |           |           |                                                             |               |                     | LC191386 | Thailand | Corn leaves                                 |
|              | 8         | 100/99.63 | <i>Lecythophora aff. decumbens</i>                          | Ascomycota    | Sordariomycetes     |          |          |                                             |
|              | 9         | 100/95.30 | <i>Sakaguchia dacryoidea</i>                                | Basidiomycota | Cystobasidiomycetes | AF444571 |          |                                             |
|              |           |           |                                                             |               |                     | AF444500 |          |                                             |
|              | 10        | 100/99.63 | <i>Lecythophora aff. decumbens</i>                          | Ascomycota    | Sordariomycetes     |          |          |                                             |
| V1           | 1         | 80/100    | <i>Cryptococcus flavescens</i>                              | Basidiomycota | Tremellomycetes     |          |          |                                             |
| V4           | 1         | 99/100    | <i>Pseudozyma sp.</i>                                       | Basidiomycota | Ustilaginomycetes   |          |          |                                             |
|              | 2         | 99/96.32  | <i>Moesziomyces parantarcticus=Pseudozyma parantarctica</i> | Basidiomycota | Ustilaginomycetes   | KP132543 | France   |                                             |
|              |           |           |                                                             |               |                     | KF619567 | Nigeria  | Yam tuber steep water                       |
|              | 3         | 84/83.59  | <i>Rhodotorula toruloides=Rhodospiridium toruloides</i>     | Basidiomycota | Microbotryomycetes  | FJ515214 | Taiwan   | Sea surface microlayer and underlying water |
|              |           |           |                                                             |               |                     | MG050093 | India    | Soil                                        |
| V5           | 2         | 100/99.81 | <i>Lecythophora aff. decumbens</i>                          | Ascomycota    | Sordariomycetes     |          |          |                                             |
| <b>Total</b> | <b>23</b> |           |                                                             |               |                     |          |          |                                             |



**Table S6:** Hydrocarbon degrading microbes previously identified in Trinidad. Microbes in bold were identified in this study.

| Microbes                                                                                                                                                                                                                                                                                                                                                                                                                                            | Locality                                | Citation |
|-----------------------------------------------------------------------------------------------------------------------------------------------------------------------------------------------------------------------------------------------------------------------------------------------------------------------------------------------------------------------------------------------------------------------------------------------------|-----------------------------------------|----------|
| <b>Fungi</b>                                                                                                                                                                                                                                                                                                                                                                                                                                        |                                         |          |
| Main fungi: <i>Aspergillus</i> , <i>Curvularia</i> , <i>Fusarium</i> , <i>Penicillium</i> and <i>Mucor</i>                                                                                                                                                                                                                                                                                                                                          | La Brea Pitch Lake;<br>Digity Seepage   | [85]     |
| <b>Bacteria</b>                                                                                                                                                                                                                                                                                                                                                                                                                                     |                                         |          |
| Main bacteria: <i>Bacillus</i> spp., <i>Achromobacter</i> spp., <i>Burkholderia</i> spp.,<br><i>Pseudomonas</i> spp., <i>Acidobacteria</i>                                                                                                                                                                                                                                                                                                          | La Brea Pitch Lake;<br>Digity Seepage   | [85]     |
| <i>Burkholderiales</i> , <i>Enterobacteriales</i> , <i>Bacteroidales</i> , <i>Rhodospirillales</i> , <i>Sphingomonadales</i> ,<br><i>Thermotogales</i> , <i>Nitrosomonadales</i> , <i>Actinomycetales</i> , <i>Hydrogenophilales</i> , <i>Neisseriales</i> ,<br><i>Clostridiales</i> , <i>Pseudomonadales</i> , <i>Anaerolineales</i> , <i>Methanosarcinales</i> ,<br><i>Thermoplasmatales</i> , <i>Methanomicrobiales</i> , <i>Halobacteriales</i> | La Brea Pitch Lake                      | [83]     |
| <i>Thiotricales</i> and <i>Campylo-bacteriales</i> , <i>Defferibacteriales</i> , <i>Thermodesulfobacteriales</i> ,<br><i>Nitrospirales</i> , <i>Desulfurimonadales</i> , and <i>Desulfobacteriales</i> , <i>Pseudomonadales</i> ,<br><i>Oceanospirillales</i> , <i>Burkholderiales</i> , <i>Acidobacteriales</i> and <i>Rhodospirillales</i>                                                                                                        | La Brea Pitch Lake                      | [84]     |
| <i>Burkholderia</i> sp., <i>Achromobacter</i> sp., <i>Leifsonia</i> sp., <i>Dyemonas</i> sp., <i>Pseudomans</i> sp.,<br><i>Paenibacillus</i> sp.                                                                                                                                                                                                                                                                                                    | Soil neighbouring La<br>Brea Pitch Lake | [82]     |
| <b>Archaea</b>                                                                                                                                                                                                                                                                                                                                                                                                                                      |                                         |          |
| <i>Thermoplasmatales</i>                                                                                                                                                                                                                                                                                                                                                                                                                            |                                         | [84]     |

**Table S7:** The Akaike information criterion (AIC) value for the genera rank abundance distribution models of the filamentous fungi and yeast communities.

| Microbe | No. of<br>genera | Abundance | Null   | Preemption | Lognormal | Zipf   | Mandelbrot |
|---------|------------------|-----------|--------|------------|-----------|--------|------------|
| Fungi   | 31               | 96        | 98.581 | 100.02     | 93.557    | 88.831 | 90.219     |
| Yeast   | 5                | 23        | 17.175 | 19.097     | 21.106    | 22.340 | 22.858     |

**Table S8:** Relative abundances of filamentous fungi and yeast in the 8 sites in southwestern Trinidad.

| <b>Genera</b>            | <b>P</b> | <b>F1</b> | <b>F2</b> | <b>V1</b> | <b>V2</b> | <b>V3</b> | <b>V4</b> | <b>V5</b> |
|--------------------------|----------|-----------|-----------|-----------|-----------|-----------|-----------|-----------|
| <b>Fungi</b>             |          |           |           |           |           |           |           |           |
| <i>Aspergillus</i>       | 0.00     | 38.89     | 0.00      | 0.00      | 0.00      | 6.25      | 25.00     | 10.00     |
| <i>Chaetomella</i>       | 0.00     | 2.78      | 0.00      | 0.00      | 0.00      | 0.00      | 0.00      | 0.00      |
| <i>Cladosporium</i>      | 20.00    | 0.00      | 14.29     | 20.00     | 0.00      | 0.00      | 0.00      | 0.00      |
| <i>Cochliobolus</i>      | 0.00     | 2.78      | 0.00      | 0.00      | 0.00      | 0.00      | 0.00      | 5.00      |
| <i>Diaporthe</i>         | 0.00     | 0.00      | 0.00      | 0.00      | 0.00      | 6.25      | 0.00      | 0.00      |
| <i>Epicoccum</i>         | 0.00     | 0.00      | 42.86     | 0.00      | 0.00      | 0.00      | 0.00      | 5.00      |
| <i>Eutypella</i>         | 20.00    | 0.00      | 0.00      | 0.00      | 0.00      | 0.00      | 0.00      | 0.00      |
| <i>Fusarium</i>          | 0.00     | 8.33      | 0.00      | 20.00     | 0.00      | 0.00      | 0.00      | 0.00      |
| <i>Gongronella</i>       | 0.00     | 0.00      | 0.00      | 0.00      | 0.00      | 0.00      | 0.00      | 5.00      |
| <i>Microsphaeropsis</i>  | 0.00     | 2.78      | 0.00      | 0.00      | 0.00      | 0.00      | 0.00      | 0.00      |
| <i>Myrothecium</i>       | 0.00     | 0.00      | 0.00      | 0.00      | 0.00      | 0.00      | 0.00      | 15.00     |
| <i>Neosascochyta</i>     | 0.00     | 2.78      | 0.00      | 0.00      | 0.00      | 0.00      | 0.00      | 0.00      |
| <i>Neocosmospora</i>     | 0.00     | 0.00      | 0.00      | 0.00      | 0.00      | 0.00      | 0.00      | 5.00      |
| <i>Oudemansiella</i>     | 0.00     | 0.00      | 14.29     | 0.00      | 0.00      | 0.00      | 0.00      | 0.00      |
| <i>Paraconiothyrium</i>  | 0.00     | 0.00      | 14.29     | 0.00      | 0.00      | 0.00      | 0.00      | 0.00      |
| <i>Paraphaeosphaeria</i> | 0.00     | 0.00      | 0.00      | 0.00      | 0.00      | 0.00      | 50.00     | 0.00      |
| <i>Penicillium</i>       | 0.00     | 5.56      | 0.00      | 0.00      | 0.00      | 50.00     | 0.00      | 25.00     |
| <i>Perenniporia</i>      | 0.00     | 0.00      | 0.00      | 60.00     | 0.00      | 0.00      | 0.00      | 0.00      |
| <i>Periconia</i>         | 0.00     | 0.00      | 0.00      | 0.00      | 33.33     | 0.00      | 0.00      | 0.00      |
| <i>Phanerochaete</i>     | 0.00     | 5.56      | 0.00      | 0.00      | 0.00      | 0.00      | 0.00      | 0.00      |
| <i>Phoma</i>             | 0.00     | 0.00      | 0.00      | 0.00      | 0.00      | 0.00      | 0.00      | 10.00     |
| <i>Phytophthora</i>      | 0.00     | 0.00      | 14.29     | 0.00      | 0.00      | 0.00      | 0.00      | 0.00      |
| <i>Pyrenochaetopsis</i>  | 0.00     | 8.33      | 0.00      | 0.00      | 0.00      | 0.00      | 0.00      | 5.00      |
| <i>Rhizopus</i>          | 0.00     | 0.00      | 0.00      | 0.00      | 0.00      | 6.25      | 0.00      | 0.00      |
| <i>Roussoella</i>        | 40.00    | 0.00      | 0.00      | 0.00      | 0.00      | 0.00      | 0.00      | 0.00      |
| <i>Saccharicola</i>      | 0.00     | 5.56      | 0.00      | 0.00      | 0.00      | 0.00      | 0.00      | 0.00      |
| <i>Scedosporium</i>      | 0.00     | 0.00      | 0.00      | 0.00      | 66.67     | 0.00      | 0.00      | 0.00      |
| <i>Sydowia</i>           | 20.00    | 0.00      | 0.00      | 0.00      | 0.00      | 0.00      | 0.00      | 0.00      |
| <i>Talaromyces</i>       | 0.00     | 5.56      | 0.00      | 0.00      | 0.00      | 31.25     | 0.00      | 5.00      |
| <i>Trichoderma</i>       | 0.00     | 11.11     | 0.00      | 0.00      | 0.00      | 0.00      | 0.00      | 10.00     |
| <i>Westerdykella</i>     | 0.00     | 0.00      | 0.00      | 0.00      | 0.00      | 0.00      | 25.00     | 0.00      |
| <b>Yeast</b>             |          |           |           |           |           |           |           |           |
| <i>Cryptococcus</i>      | 0.00     | 11.11     | 33.33     | 100.00    | 0.00      | 0.00      | 0.00      | 0.00      |
| <i>Lecythophora</i>      | 0.00     | 44.44     | 33.33     | 0.00      | 0.00      | 0.00      | 0.00      | 100.00    |
| <i>Moesziomyces</i>      | 0.00     | 0.00      | 0.00      | 0.00      | 0.00      | 0.00      | 66.67     | 0.00      |
| <i>Rhodotorula</i>       | 0.00     | 44.44     | 22.22     | 0.00      | 0.00      | 0.00      | 33.33     | 0.00      |
| <i>Sakaguchia</i>        | 0.00     | 0.00      | 11.11     | 0.00      | 0.00      | 0.00      | 0.00      | 0.00      |

**Table S9:** Diversity indices for filamentous fungal communities in the 8 sites in southwestern Trinidad.

|                 |        | Diversity  |                | Richness |        | Dominance |                | Evenness         |
|-----------------|--------|------------|----------------|----------|--------|-----------|----------------|------------------|
| Site            | N      | H          | D <sub>1</sub> | S        | Chao 1 | Absolute  | D <sub>2</sub> | E <sub>1/D</sub> |
| P               | 5      | 1.332      | 0.720          | 4        | 8.500  | 2         | 0.280          | 0.893            |
| F1              | 36     | 2.066      | 0.807          | 12       | 14.000 | 14        | 0.193          | 0.432            |
| F2              | 7      | 1.475      | 0.735          | 5        | 11.000 | 3         | 0.265          | 0.754            |
| V1              | 5      | 0.950      | 0.560          | 3        | 4.000  | 3         | 0.440          | 0.758            |
| V2              | 3      | 0.637      | 0.444          | 2        | 2.500  | 2         | 0.556          | 0.900            |
| V3              | 16     | 1.230      | 0.641          | 5        | 8.000  | 8         | 0.359          | 0.557            |
| V4              | 4      | 1.040      | 0.625          | 3        | 5.000  | 2         | 0.375          | 0.889            |
| V5              | 20     | 2.221      | 0.870          | 11       | 17.000 | 5         | 0.130          | 0.699            |
| <b>ANOVA</b>    | 0.858  | <2e-16 *** | <2e-16 ***     | 0.002**  | 0.957  | -         | -              | <2e-16 ***       |
| <b>Locality</b> |        |            |                |          |        |           |                |                  |
| Pablito         | 5.000  | 1.332      | 0.720          | 4        | 8.500  | 2         | 0.280          | 0.893            |
| Fyzabad         | 43.000 | 2.414      | 0.858          | 17       | 25.000 | 14        | 0.142          | 0.414            |
| Vance           | 48.000 | 2.516      | 0.876          | 19       | 39.170 | 13        | 0.124          | 0.425            |
| <b>ANOVA</b>    | 0.2655 | -          | -              | 0.255    | 0.24   | -         | -              | -                |

**Table S10.** Diversity indices for yeast communities in the 8 sites in southwestern Trinidad.

|                 |       | Diversity  |                | Richness |        | Dominance |                | Evenness         |
|-----------------|-------|------------|----------------|----------|--------|-----------|----------------|------------------|
| Site            | N     | H'         | D <sub>1</sub> | S        | Chao 1 | Absolute  | D <sub>2</sub> | E <sub>1/D</sub> |
| F1              | 9     | 0.965      | 0.593          | 3        | 3      | 4         | 0.407          | 0.818            |
| F2              | 9     | 1.311      | 0.716          | 4        | 4.5    | 3         | 0.284          | 0.880            |
| V1              | 1     | 0.000      | 0.000          | 1        | 1      | 1         | 1.000          | 1.000            |
| V4              | 3     | 0.637      | 0.444          | 2        | 2.5    | 2         | 0.556          | 0.900            |
| V5              | 1     | 0.000      | 0.000          | 1        | 1      | 1         | 1.000          | 1.000            |
| <b>ANOVA</b>    | 0.069 | <2e-16 *** | <2e-16 ***     | 0.164    | 0.242  | -         | -              | <2e-16 ***       |
| <b>Locality</b> |       |            |                |          |        |           |                |                  |
| Fyzabad         | 18    | 1.228      | 0.685          | 4        | 4      | 7         | 0.315          | 0.794            |
| Vance           | 5     | 1.332      | 0.720          | 4        | 8.5    | 2         | 0.280          | 0.893            |
| <b>ANOVA</b>    | -     | -          | -              | -        | -      | -         | -              | -                |

**Table S11:** SIMPER analysis. Cumulative and overall contributions of key contributing genera responsible for the observed patterns between sites. For example, for the filamentous fungal community, differences between Pablito and Fyzabad are driven by *Aspergillus*, *Epicoccum*, *Roussoella*, *Eutypella*, *Sydowia*, *Trichoderma*, *Oudemansiella* and *Paraconiothyrium* in descending order; together these eight genera drive more than 70% of the difference between communities in Pablito and Fyzabad; overall the filamentous fungal communities in Pablito and Fyzabad are 91.7% different from each other.

| Microbial community | Locality        | Genera                  | Cumulative contribution | Overall Contribution |
|---------------------|-----------------|-------------------------|-------------------------|----------------------|
| Fungi               | Pablito_Fyzabad | <i>Aspergillus</i>      | 0.186                   | 0.917                |
|                     |                 | <i>Epicoccum</i>        | 0.323                   |                      |
|                     |                 | <i>Roussoella</i>       | 0.440                   |                      |
|                     |                 | <i>Eutypella</i>        | 0.499                   |                      |
|                     |                 | <i>Sydowia</i>          | 0.558                   |                      |
|                     |                 | <i>Trichoderma</i>      | 0.611                   |                      |
|                     |                 | <i>Oudemansiella</i>    | 0.656                   |                      |
|                     |                 | <i>Paraconiothyrium</i> | 0.702                   |                      |
|                     | Pablito_Vance   | <i>Roussoella</i>       | 0.177                   | 0.960                |
|                     |                 | <i>Penicillium</i>      | 0.298                   |                      |
|                     |                 | <i>Eutypella</i>        | 0.386                   |                      |
|                     |                 | <i>Sydowia</i>          | 0.474                   |                      |
|                     |                 | <i>Cladosporium</i>     | 0.542                   |                      |
|                     |                 | <i>Perenniporia</i>     | 0.604                   |                      |
|                     |                 | <i>Talaromyces</i>      | 0.662                   |                      |
|                     |                 | <i>Scedosporium</i>     | 0.714                   |                      |
|                     | Fyzabad_Vance   | <i>Apergillus</i>       | 0.186                   | 0.915                |
|                     |                 | <i>Epicoccum</i>        | 0.300                   |                      |
|                     |                 | <i>Penicillium</i>      | 0.393                   |                      |
|                     |                 | <i>Trichoderma</i>      | 0.446                   |                      |
|                     |                 | <i>Talaromyces</i>      | 0.499                   |                      |
|                     |                 | <i>Fusarium</i>         | 0.542                   |                      |
|                     |                 | <i>Pyrenochaetopsis</i> | 0.581                   |                      |
|                     |                 | <i>Oudemansiella</i>    | 0.620                   |                      |
|                     |                 | <i>Paraconiothyrium</i> | 0.658                   |                      |
|                     |                 | <i>Phytophthora</i>     | 0.697                   |                      |
|                     |                 | <i>Perenniporia</i>     | 0.733                   |                      |
| Yeast               | Fyzabad_Vance   | <i>Lecythophora</i>     | 0.366                   | 0.811                |
|                     |                 | <i>Rhodotorula</i>      | 0.682                   |                      |
|                     |                 | <i>Cryptococcus</i>     | 0.873                   |                      |
